# Supplementary material
Source: Springer Nature journal article supplement (https://www.springermedizin.de/resource/supplementary/12889_2012_4914_MOESM5_ESM.pdf/9492788)

## INTERVENTION

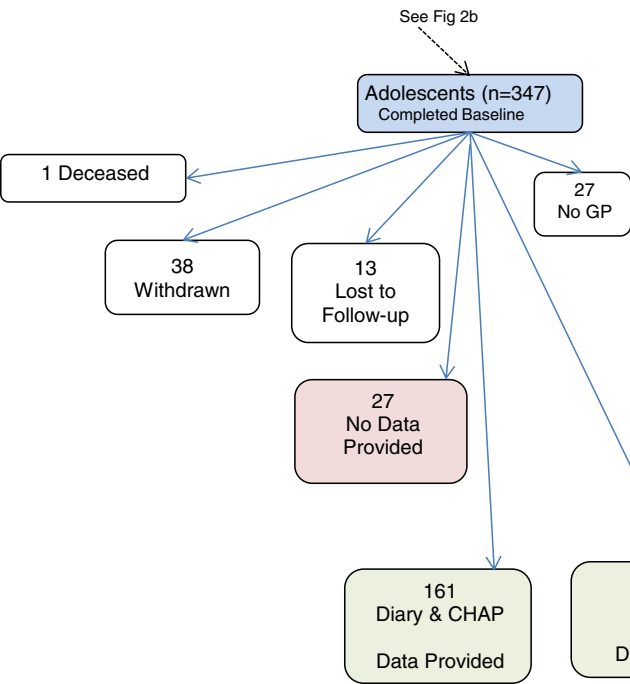

## USUAL CARE

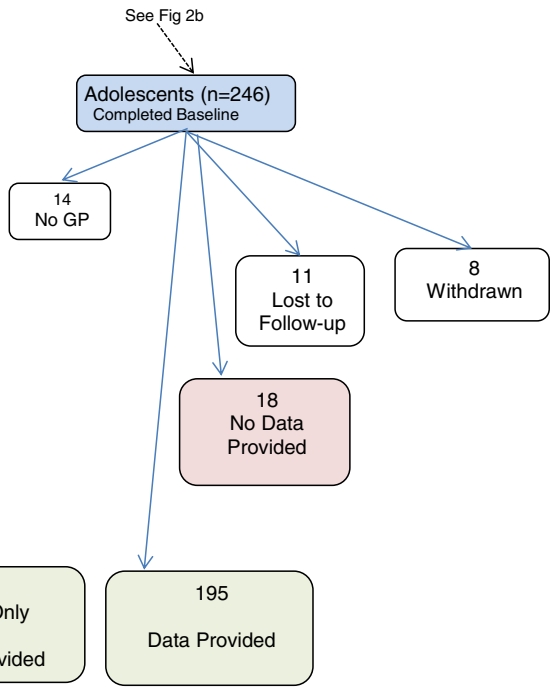

Supplement: MOESM5 [file 9492788]
